# Supplementary material
Source: publisher site journal article supplement (https://www.dovepress.com/get_supplementary_file.php?f=290118.docx)
Supplement: Supplementary file 1 [file get_supplementary_file.php]

| **Supplementary Table 1. Patient and Provider Characteristics by Month of Admission in Hospitalized Patients in the Study** | | | | | |
| --- | --- | --- | --- | --- | --- |
|  | **April** | **May** | **June** | **July** | ***p* value*** | |
|  | **N (%) /**  **Mean (SD)** | **N (%) /**  **Mean (SD)** | **N (%) /**  **Mean (SD)** | **N (%) /**  **Mean (SD)** |  | |
| **Total Number of Patients** | 21736 | 11640 | 9159 | 10729 |  | |
| **Age (Continuous)** | 64.13 (17.05) | 61.02 (19.28) | 58.04 (19.36) | 58.84 (19.19) | <0.0001 | |
| **Age (Categorical)** |  |  |  |  | <0.0001 | |
| <18 | 107 ( 0.5) | 158 ( 1.4) | 93 ( 1.0) | 132 ( 1.2) |  | |
| 18-40 | 1966 ( 9.0) | 1629 ( 14.0) | 1765 ( 19.3) | 1824 ( 17.0) |  | |
| 40-49 | 2075 ( 9.5) | 1294 ( 11.1) | 1134 ( 12.4) | 1323 ( 12.3) |  | |
| 50-59 | 3645 ( 16.8) | 1906 ( 16.4) | 1565 ( 17.1) | 1811 ( 16.9) |  | |
| 60-69 | 5029 ( 23.1) | 2307 ( 19.8) | 1676 ( 18.3) | 2110 ( 19.7) |  | |
| 70-79 | 4319 ( 19.9) | 2063 ( 17.7) | 1519 ( 16.6) | 1851 ( 17.3) |  | |
| 80+ | 4595 ( 21.1) | 2283 ( 19.6) | 1407 ( 15.4) | 1678 ( 15.6) |  | |
| **Female** | 10080 ( 46.4) | 5797 ( 49.8) | 4658 ( 50.9) | 5447 ( 50.8) | <0.0001 | |
| **Race** |  |  |  |  | <0.0001 | |
| White | 8649 ( 39.8) | 5429 ( 46.6) | 4730 ( 51.6) | 6091 ( 56.8) |  | |
| African American | 5017 ( 23.1) | 2573 ( 22.1) | 2165 ( 23.6) | 2644 ( 24.6) |  | |
| Other/Unknown | 8070 ( 37.1) | 3638 ( 31.3) | 2264 ( 24.7) | 1994 ( 18.6) |  | |
| **Insurance Type** |  |  |  |  | <0.0001 | |
| Commercial | 4735 ( 21.8) | 2327 ( 20.0) | 2251 ( 24.6) | 2739 ( 25.5) |  | |
| Medicare | 11589 ( 53.3) | 5740 ( 49.3) | 3944 ( 43.1) | 4854 ( 45.2) |  | |
| Medicaid | 4020 ( 18.5) | 2472 ( 21.2) | 1603 ( 17.5) | 1661 ( 15.5) |  | |
| Other | 1392 ( 6.4) | 1101 ( 9.5) | 1361 ( 14.9) | 1475 ( 13.7) |  | |
| **Marital Status** |  |  |  |  | <0.0001 | |
| Single | 11867 ( 54.6) | 6602 ( 56.7) | 4937 ( 53.9) | 5609 ( 52.3) |  | |
| Married | 8089 ( 37.2) | 3996 ( 34.3) | 3658 ( 39.9) | 4611 ( 43.0) |  | |
| Other/Missing | 1780 ( 8.2) | 1042 ( 9.0) | 564 ( 6.2) | 509 ( 4.7) |  | |
| **Elixhauser Index Score** |  |  |  |  | <0.0001 | |
| 0 | 1308 ( 6.0) | 957 ( 8.2) | 916 ( 10.0) | 1067 ( 9.9) |  | |
| 1 - 2 | 5816 ( 26.8) | 3007 ( 25.8) | 2773 ( 30.3) | 3369 ( 31.4) |  | |
| 3 - 4 | 7336 ( 33.8) | 3621 ( 31.1) | 2836 ( 31.0) | 3559 ( 33.2) |  | |
| 5 + | 7276 ( 33.5) | 4055 ( 34.8) | 2634 ( 28.8) | 2734 ( 25.5) |  | |
| **Rural Hospital** | 1100 ( 5.1) | 748 ( 6.4) | 690 ( 7.5) | 1202 ( 11.2) | <0.0001 | |
| **Total Number of Beds** |  |  |  |  | <0.0001 | |
| 000-299 | 6989 ( 32.2) | 3720 ( 32.0) | 2789 ( 30.5) | 3652 ( 34.0) |  | |
| 300-499 | 6815 ( 31.4) | 3659 ( 31.4) | 2768 ( 30.2) | 3112 ( 29.0) |  | |
| 500+ | 7932 ( 36.5) | 4261 ( 36.6) | 3602 ( 39.3) | 3965 ( 37.0) |  | |
| **Teaching Hospital** | 13633 ( 62.7) | 6370 ( 54.7) | 4437 ( 48.4) | 4758 ( 44.3) | <0.0001 | |
| **Provider Region** |  |  |  |  | <0.0001 | |
| Northeast | 12992 ( 59.8) | 3954 ( 34.0) | 1182 ( 12.9) | 667 ( 6.2) |  | |
| Midwest | 3845 ( 17.7) | 3410 ( 29.3) | 1794 ( 19.6) | 1761 ( 16.4) |  | |
| West | 515 ( 2.4) | 311 ( 2.7) | 505 ( 5.5) | 611 ( 5.7) |  | |
| South | 4384 ( 20.2) | 3965 ( 34.1) | 5678 ( 62.0) | 7690 ( 71.7) |  | |
| * *p* values were based on t-test or χ2 test (two-sided) | | | | | |
| SD, Standard deviation |  |  |  |  |  | |

| **Supplementary Table 2. Monthly Trend in Use of Therapies for COVID-19 from April to July, 2020 in Hospitalized COVID-19 Patients in the US** | | | | | |
| --- | --- | --- | --- | --- | --- |
|  | **April** | **May** | **June** | **July** | ***p* value*** | |
|  | **N (%)** | **N (%)** | **N (%)** | **N (%)** |  | |
| **Total Number of Patients** | 21736 | 11640 | 9159 | 10729 |  | |
| **HCQ plus AZM** | 7081 (32.6) | 504 ( 4.3) | 52 ( 0.6) | 51 ( 0.5) | <0.0001 | |
| **HCQ alone** | 4263 (19.6) | 556 ( 4.8) | 50 ( 0.5) | 50 ( 0.5) | <0.0001 | |
| **AZM alone** | 4172 (19.2) | 4127 (35.5) | 3757 (41.0) | 4428 (41.3) | <0.0001 | |
| **Remdesivir** | 79 ( 0.4) | 651 ( 5.6) | 1199 (13.1) | 1138 (10.6) | <0.0001 | |
| **Lopinavir/ritonavir or other HIV protease inhibitors** | 442 ( 2.0) | 181 ( 1.6) | 80 ( 0.9) | 58 ( 0.5) | <0.0001 | |
| **Ivermectin** | 55 ( 0.3) | 10 ( 0.1) | 22 ( 0.2) | 94 ( 0.9) | <0.0001 | |
| **Dexamethasone** | 1032 ( 4.7) | 958 ( 8.2) | 3143 (34.3) | 6566 (61.2) | <0.0001 | |
| **Methylprednisolone** | 5084 (23.4) | 2562 (22.0) | 1781 (19.4) | 1125 (10.5) | <0.0001 | |
| **Toclizumab** | 1460 ( 6.7) | 962 ( 8.3) | 580 ( 6.3) | 400 ( 3.7) | <0.0001 | |
| **Colchicine** | 146 ( 0.7) | 85 ( 0.7) | 62 ( 0.7) | 150 ( 1.4) | <0.0001 | |
| **Convalescent Plasma** | 339 ( 1.6) | 359 ( 3.1) | 285 ( 3.1) | 250 ( 2.3) | <0.0001 | |
| **Anticoagulants** | 18905 (87.0) | 10244 (88.0) | 7875 (86.0) | 9117 (85.0) | <0.0001 | |
| **Lisinopril** | 1733 ( 8.0) | 1182 (10.2) | 1019 (11.1) | 1225 (11.4) | <0.0001 | |
| ** p* values were based on Pearson’s correlation tests for linear trend. | | | | | |
| HCQ, Hydroxychloroquine; AZM, Azithromycin. |  |  |  |  |  | |

| **Supplementary Table 3. Monthly Trend in Use of Therapies from April to July, 2020 in Hospitalized COVID-19 Patients Admitted to Intensive Care Unit in the US** | | | | | |
| --- | --- | --- | --- | --- | --- |
|  | **April** | **May** | **June** | **July** | ***p* value*** |
|  | **N (%)** | **N (%)** | **N (%)** | **N (%)** |  |
| **Total Number of Patients** | 5139 | 2966 | 2214 | 2006 |  |
| **HCQ plus AZM** | 2227 (43.3) | 206 ( 6.9) | 23 ( 1.0) | 10 ( 0.5) | <0.001 |
| **HCQ alone** | 935 (18.2) | 168 ( 5.7) | 15 ( 0.7) | 13 ( 0.6) | <0.001 |
| **AZM alone** | 875 (17.0) | 1181 (39.8) | 1008 (45.5) | 834 (41.6) | <0.001 |
| **Remdesivir** | 61 ( 1.2) | 314 (10.6) | 500 (22.6) | 414 (20.6) | <0.001 |
| **Lopinavir/ritonavir or other HIV protease inhibitors** | 159 ( 3.1) | 66 ( 2.2) | 12 ( 0.5) | 10 ( 0.5) | <0.001 |
| **Ivermectin** | 38 ( 0.7) | 6 ( 0.2) | 15 ( 0.7) | 67 ( 3.3) | <0.001 |
| **Dexamethasone** | 589 (11.5) | 507 (17.1) | 1166 (52.7) | 1527 (76.1) | <0.001 |
| **Methylprednisolone** | 2333 (45.4) | 1201 (40.5) | 703 (31.8) | 276 (13.8) | <0.001 |
| **Toclizumab** | 1031 (20.1) | 597 (20.1) | 335 (15.1) | 202 (10.1) | <0.001 |
| **Colchicine** | 45 ( 0.9) | 22 ( 0.7) | 25 ( 1.1) | 92 ( 4.6) | <0.001 |
| **Convalescent Plasma** | 232 ( 4.5) | 242 ( 8.2) | 147 ( 6.6) | 125 ( 6.2) | <0.001 |
| **Anticoagulants** | 4860 (94.6) | 2818 (95.0) | 2075 (93.7) | 1826 (91.0) | <0.001 |
| **Lisinopril** | 404 ( 7.9) | 318 (10.7) | 233 (10.5) | 195 ( 9.7) | <0.001 |
| ** p* values were based on Pearson’s correlation tests for linear trend. | | | | | |
| HCQ, Hydroxychloroquine; AZM, Azithromycin. |  |  |  |  |  |

| **Supplementary Table 4. Adjusted Odds Ratios of Therapies Use in May, June, or July Compared to April among COVID-19 Hospitalized Patients in the US *** | | | | | |
| --- | --- | --- | --- | --- | --- |
| **Medications** | **Comparison Groups** | **OR** | **Lower CI** | **Upper CI** | ***p* value** |
| **HCQ plus AZM** | May vs. April | 0.0824 | 0.0749 | 0.0907 | <0.0001 |
|  | June vs. April | 0.0099 | 0.0075 | 0.0131 | <0.0001 |
|  | July vs. April | 0.0085 | 0.0064 | 0.0112 | <0.0001 |
| **HCQ alone** | May vs. April | 0.2561 | 0.2331 | 0.2813 | <0.0001 |
|  | June vs. April | 0.0359 | 0.0271 | 0.0477 | <0.0001 |
|  | July vs. April | 0.0335 | 0.0252 | 0.0446 | <0.0001 |
| **AZM alone** | May vs. April | 2.1125 | 2.0017 | 2.2294 | <0.0001 |
|  | June vs. April | 2.1863 | 2.0600 | 2.3204 | <0.0001 |
|  | July vs. April | 2.0733 | 1.9540 | 2.2000 | <0.0001 |
| **Remdesivir** | May vs. April | 13.9936 | 11.0029 | 17.7973 | <0.0001 |
|  | June vs. April | 30.3523 | 23.8741 | 38.5883 | <0.0001 |
|  | July vs. April | 23.7499 | 18.6503 | 30.2439 | <0.0001 |
| **Lopinavir/ritonavir or other HIV protease inhibitors** | May vs. April | 0.7534 | 0.6268 | 0.9055 | 0.0025 |
| June vs. April | 0.4165 | 0.3214 | 0.5397 | <0.0001 |
| July vs. April | 0.2758 | 0.2045 | 0.3719 | <0.0001 |
| **Ivermectin** | May vs. April | 0.2413 | 0.1177 | 0.4949 | 0.0001 |
|  | June vs. April | 0.6124 | 0.3541 | 1.0590 | 0.0793 |
|  | July vs. April | 2.0891 | 1.4146 | 3.0851 | 0.0002 |
| **Dexamethasone** | May vs. April | 1.7807 | 1.6209 | 1.9562 | <0.0001 |
|  | June vs. April | 11.1536 | 10.2567 | 12.1290 | <0.0001 |
|  | July vs. April | 37.7881 | 34.6985 | 41.1528 | <0.0001 |
| **Methylprednisolone** | May vs. April | 1.0116 | 0.9545 | 1.0721 | 0.6962 |
|  | June vs. April | 0.9291 | 0.8675 | 0.9951 | 0.0356 |
|  | July vs. April | 0.4769 | 0.4403 | 0.5164 | <0.0001 |
| **Tocilizumab** | May vs. April | 1.1575 | 1.0540 | 1.2711 | 0.0022 |
|  | June vs. April | 0.8037 | 0.7163 | 0.9018 | 0.0002 |
|  | July vs. April | 0.5076 | 0.4458 | 0.5779 | <0.0001 |
| **Colchicine** | May vs. April | 1.0449 | 0.7838 | 1.3929 | 0.7648 |
|  | June vs. April | 0.8320 | 0.5881 | 1.1771 | 0.2988 |
|  | July vs. April | 1.5897 | 1.2141 | 2.0814 | 0.0007 |
| **Convalescent plasma** | May vs. April | 2.2374 | 1.9054 | 2.6272 | <0.0001 |
|  | June vs. April | 3.2223 | 2.7037 | 3.8403 | <0.0001 |
|  | July vs. April | 2.9240 | 2.4230 | 3.5287 | <0.0001 |
| **Anticoagulants** | May vs. April | 1.2904 | 1.1969 | 1.3912 | <0.0001 |
|  | June vs. April | 1.0816 | 0.9952 | 1.1755 | 0.0649 |
|  | July vs. April | 1.0200 | 0.9401 | 1.1066 | 0.6346 |
| **Lisinopril** | May vs. April | 1.2561 | 1.1570 | 1.3636 | <0.0001 |
|  | June vs. April | 1.3901 | 1.2679 | 1.5240 | <0.0001 |
|  | July vs. April | 1.3562 | 1.2386 | 1.4850 | <0.0001 |
| * Odds ratios, 95% CIs, and *p* values were calculated using generalized estimating equations (GEE) model accounting for potential clustering of outcomes within hospitals, and adjusting for patient demographics, comorbidity status, and provider characteristics listed in supplementary table 1. | | | | | |
| OR, Odds ratio; CI, Confidence interval; HCQ, Hydroxychloroquine; AZM, Azithromycin. | | | | | |

| **Supplementary Table 5. Adjusted Odds Ratios of Therapies Use in May, June, or July Compared to April among COVID-19 Hospitalized Patients Admitted to Intensive Care Unit in the US *** | | | | | |
| --- | --- | --- | --- | --- | --- |
| **Medications** | **Comparison Groups** | **OR** | **Lower CI** | **Upper CI** | **p** | |
| **HCQ plus AZM** | May vs. April | 0.0908 | 0.0777 | 0.1061 | <0.0001 | |
|  | June vs. April | 0.0124 | 0.0081 | 0.0188 | <0.0001 | |
|  | July vs. April | 0.0060 | 0.0032 | 0.0112 | <0.0001 | |
| **HCQ alone** | May vs. April | 0.2942 | 0.2470 | 0.3503 | <0.0001 | |
|  | June vs. April | 0.0384 | 0.0229 | 0.0646 | <0.0001 | |
|  | July vs. April | 0.0359 | 0.0203 | 0.0636 | <0.0001 | |
| **AZM alone** | May vs. April | 3.3209 | 2.9793 | 3.7016 | <0.0001 | |
|  | June vs. April | 3.8637 | 3.4221 | 4.3623 | <0.0001 | |
|  | July vs. April | 3.3706 | 2.9586 | 3.8399 | <0.0001 | |
| **Remdesivir** | May vs. April | 9.4185 | 7.0685 | 12.5498 | <0.0001 | |
|  | June vs. April | 19.1061 | 14.3463 | 25.4450 | <0.0001 | |
|  | July vs. April | 16.5308 | 12.3189 | 22.1827 | <0.0001 | |
| **Lopinavir/ritonavir or other HIV protease inhibitors** | May vs. April | 0.7740 | 0.5678 | 1.0552 | 0.1053 | |
| June vs. April | 0.2027 | 0.1082 | 0.3798 | <0.0001 | |
| July vs. April | 0.2243 | 0.1121 | 0.4485 | <0.0001 | |
| **Ivermectin** | May vs. April | 0.2232 | 0.0898 | 0.5547 | 0.0012 | |
|  | June vs. April | 0.5986 | 0.3040 | 1.1787 | 0.1377 | |
|  | July vs. April | 2.1167 | 1.3150 | 3.4072 | 0.0020 | |
| **Dexamethasone** | May vs. April | 1.6709 | 1.4640 | 1.9070 | <0.0001 | |
|  | June vs. April | 9.6026 | 8.3941 | 10.9852 | <0.0001 | |
|  | July vs. April | 29.5085 | 25.1948 | 34.5607 | <0.0001 | |
| **Methylprednisolone** | May vs. April | 0.9684 | 0.8791 | 1.0669 | 0.5161 | |
|  | June vs. April | 0.7627 | 0.6789 | 0.8568 | <0.0001 | |
|  | July vs. April | 0.2800 | 0.2401 | 0.3265 | <0.0001 | |
| **Tocilizumab** | May vs. April | 1.0219 | 0.9072 | 1.1510 | 0.7218 | |
|  | June vs. April | 0.7248 | 0.6239 | 0.8420 | <0.0001 | |
|  | July vs. April | 0.4711 | 0.3936 | 0.5640 | <0.0001 | |
| **Colchicine** | May vs. April | NA | NA | NA | NA | |
|  | June vs. April | NA | NA | NA | NA | |
|  | July vs. April | NA | NA | NA | NA | |
| **Convalescent plasma** | May vs. April | 2.0360 | 1.6730 | 2.4778 | <0.0001 | |
|  | June vs. April | 2.2185 | 1.7645 | 2.7893 | <0.0001 | |
|  | July vs. April | 2.0816 | 1.6119 | 2.6881 | <0.0001 | |
| **Anticoagulants** | May vs. April | 1.2306 | 0.9931 | 1.5250 | 0.0578 | |
|  | June vs. April | 0.9074 | 0.7203 | 1.1430 | 0.4093 | |
|  | July vs. April | 0.6246 | 0.4938 | 0.7901 | 0.0001 | |
| **Lisinopril** | May vs. April | 1.3575 | 1.1543 | 1.5964 | 0.0002 | |
|  | June vs. April | 1.2994 | 1.0769 | 1.5678 | 0.0063 | |
|  | July vs. April | 1.1466 | 0.9331 | 1.4090 | 0.1932 | |
| * Odds ratios, 95% CIs, and *p* values were calculated using generalized estimating equations (GEE) model accounting for potential clustering of outcomes within hospitals, and adjusting for patient demographics, comorbidity status, and provider characteristics listed in supplementary table 1. | | | | | |
| OR, Odds ratio; CI, Confidence interval; ICU, Intensive Care Unit; HCQ, Hydroxychloroquine; AZM, Azithromycin. | | | | | |
